# Supplementary material for: Definition of constitutive and stage-enriched promoters in the rodent malaria parasite, Plasmodium yoelii
Source: PubMed Central journal article supplement (PMC7685602; doi:10.1186/s12936-020-03498-w), 2020-11-23

# Additional File 13 - Bowman and Finger *et al.*

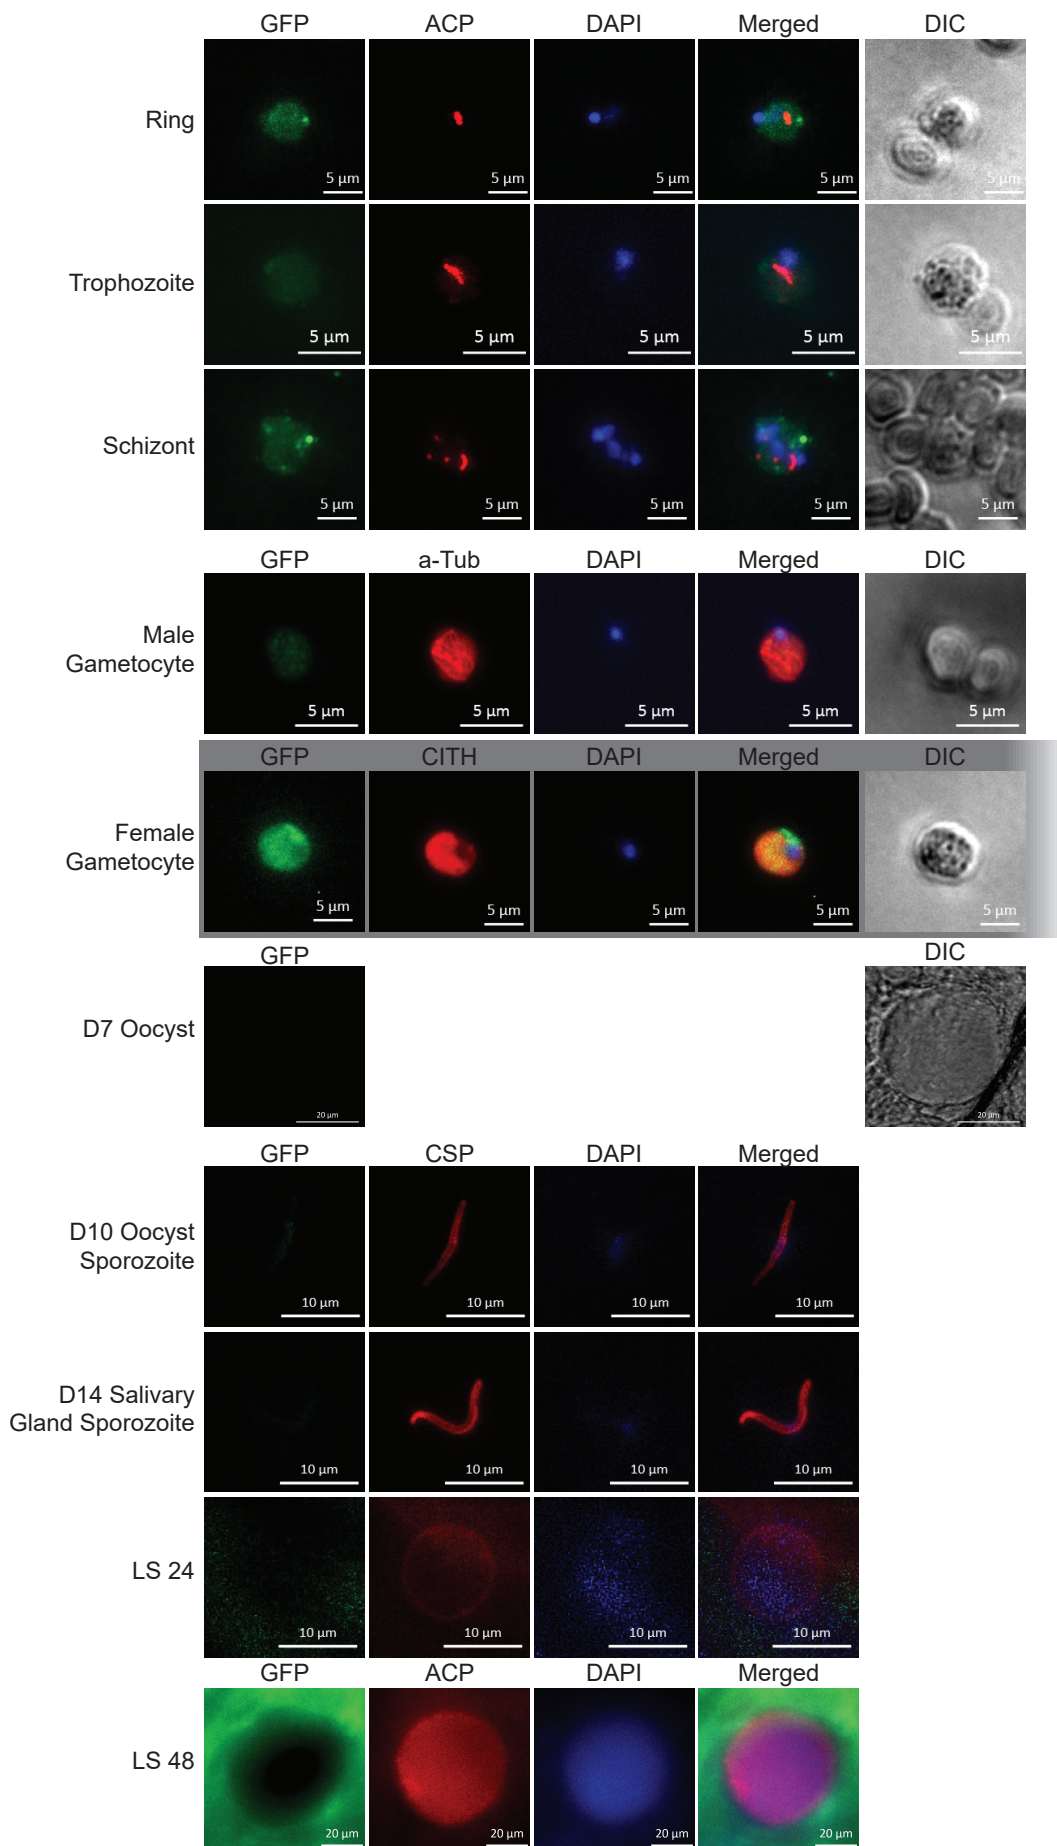

Supplement: 12936_2020_3498_MOESM12_ESM.pdf [file 12936_2020_3498_MOESM12_ESM.pdf]
