# Supplementary material for: Definition of constitutive and stage-enriched promoters in the rodent malaria parasite, Plasmodium yoelii
Source: Springer Nature journal article supplement (doi:10.1186/s12936-020-03498-w), 2020-11-23
Supplement: MOESM6 [file 18615814]

## Additional File 7 - Bowman and Finger *et al.*

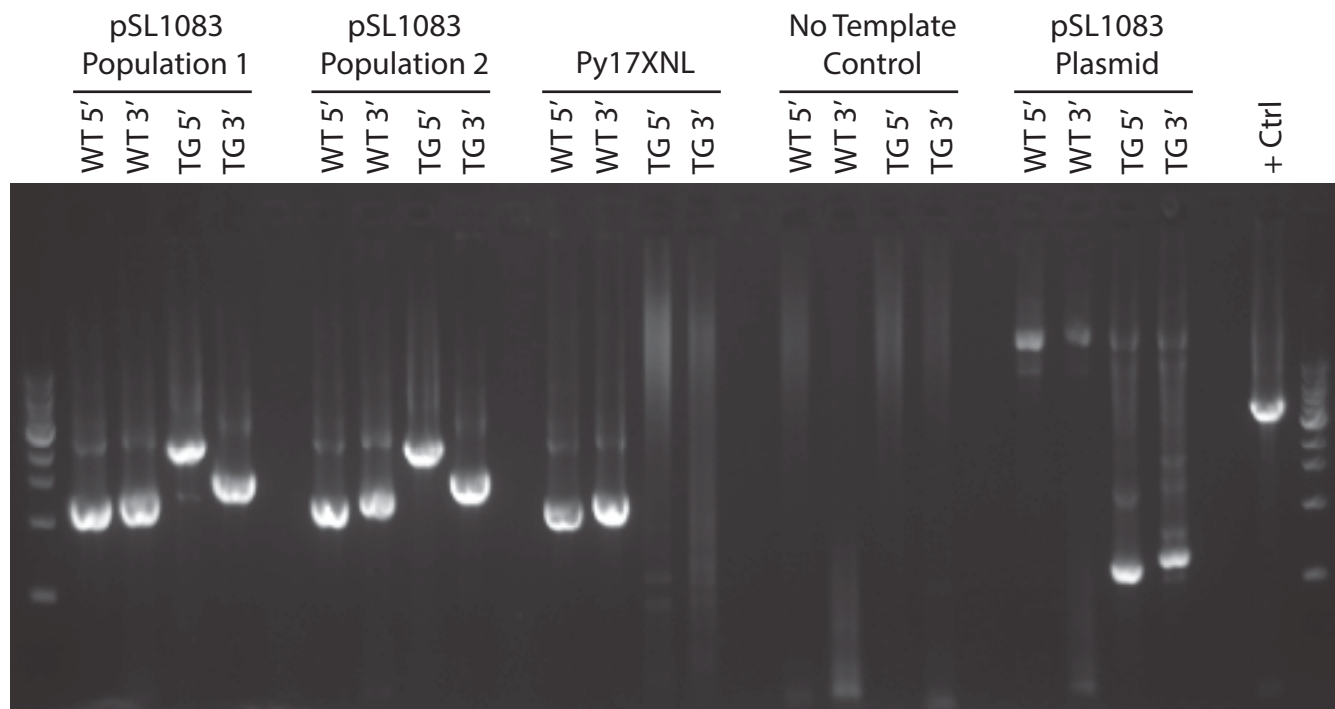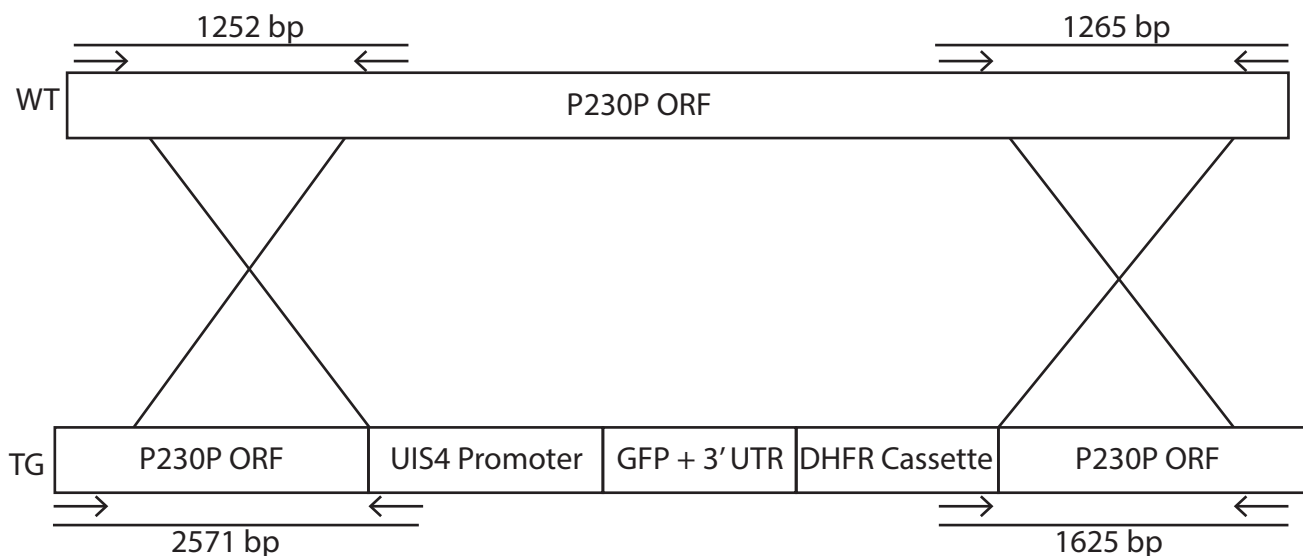

**Additional File 7: Integration of *pyuis4* promoter and GFPmut2 reporter into the *p230p* safe harbor locus of *Plasmodium yoelii*.** (Top) Genotyping PCR was conducted with two parasite populations transfected with the linearized pSL1083 plasmid and wild-type parasites. Primer sets specific to wild-type parasites (WT-5', WT-3') or transgenic parasites (TG-5', TG-3') were used to assess integration on both sides of the *pyp230p* locus. (Bottom) Expected PCR amplicons are noted in the genomic loci schematic.
