# Supplementary material for: Definition of constitutive and stage-enriched promoters in the rodent malaria parasite, Plasmodium yoelii
Source: Springer Nature journal article supplement (doi:10.1186/s12936-020-03498-w), 2020-11-23

# Additional File 14 - Bowman and Finger *et al.*

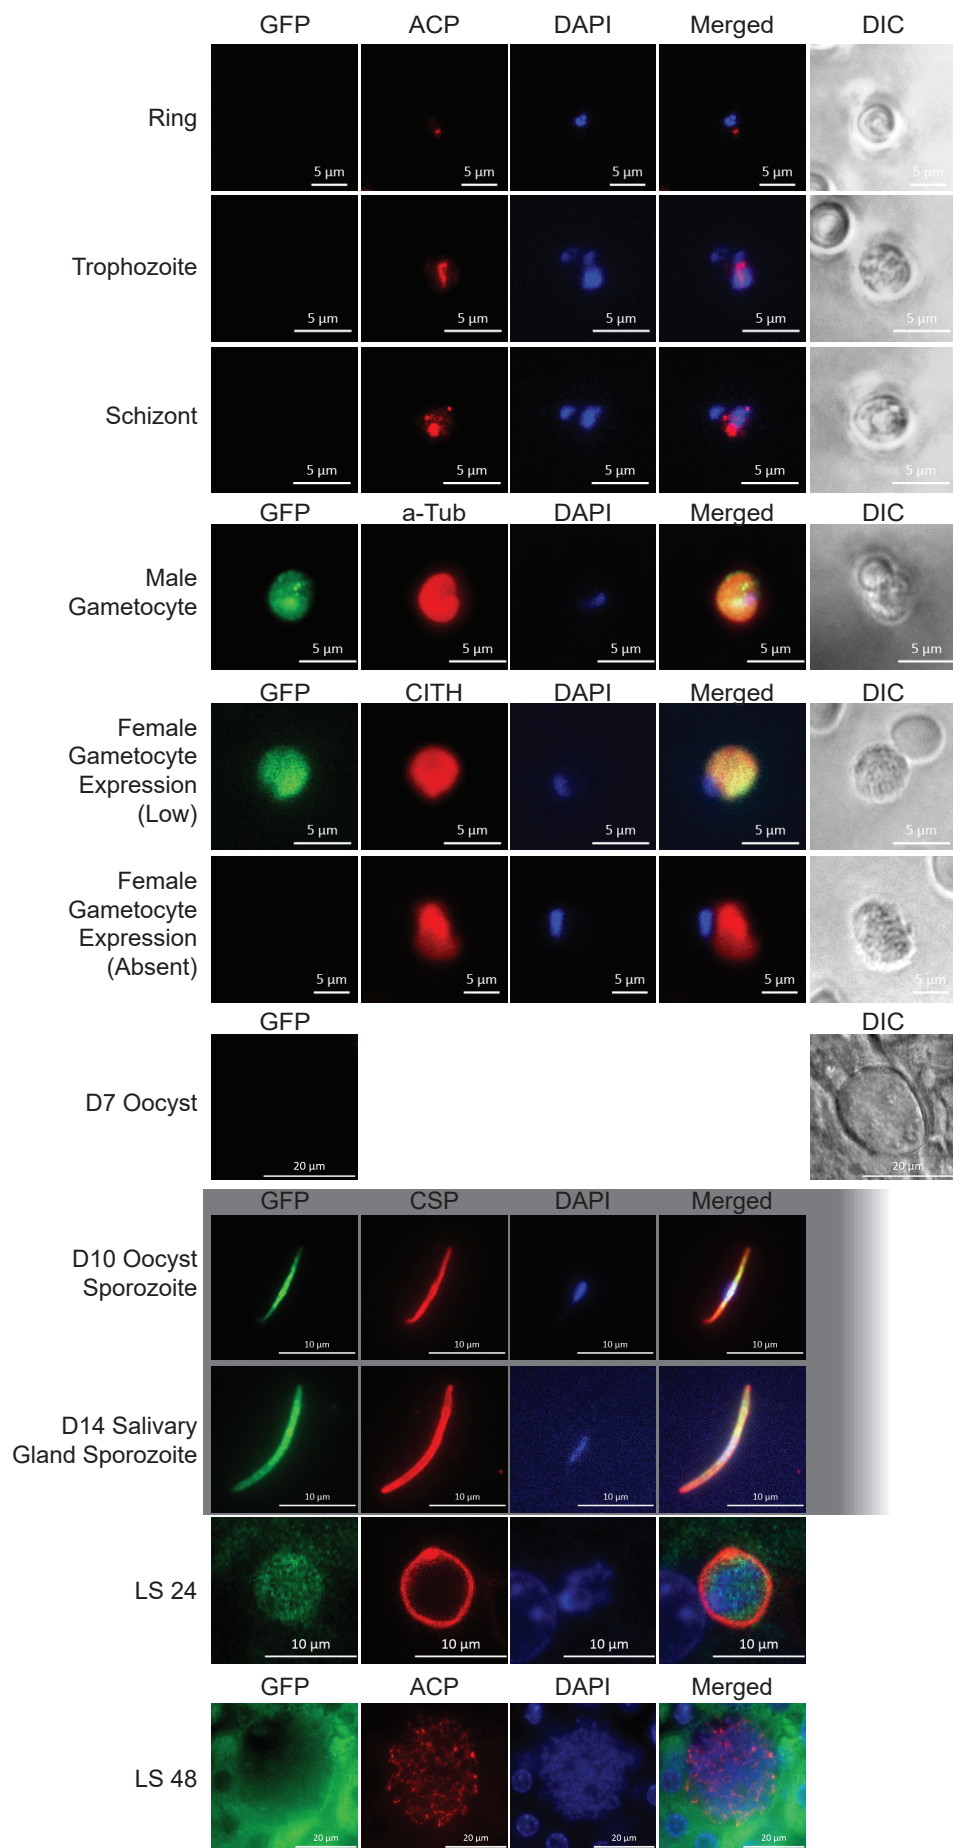

Supplement: MOESM13 [file 18615814]
